# Supplementary material for: Identification of Potential Crucial Genes and Key Pathways in Breast Cancer Using Bioinformatic Analysis
Source: Front Genet. 2019 Aug 2;10:695. doi: 10.3389/fgene.2019.00695 (PMC6688090; doi:10.3389/fgene.2019.00695)
Supplement: Supplementary file 5 [file Table_2.xlsx]

## Sheet: Table S2
Table S2. Characteristics of all nodes in the PPI network of the DEGs.
Name	Type	Degree	Betweenness	Subgragh	MCODE_Cluster	MCODE_Score
CDK1	UP	78	1255.22	1.54e+20	Cluster 1	38.4641
CCNA2	UP	72	760.484	1.48e+20	Cluster 1	38.4641
TOP2A	UP	68	623.467	1.46e+20	Cluster 1	38.4641
CCNB1	UP	68	617.577	1.45e+20	Cluster 1	38.4641
KIF11	UP	64	385.452	1.45e+20	Cluster 1	38.4641
MELK	UP	64	352.329	1.43e+20	Cluster 1	38.4641
NCAPG	UP	64	149.102	1.42e+20	Cluster 1	38.4641
MAD2L1	UP	64	373.119	1.41e+20	Cluster 1	38.4641
KIF2C	UP	63	120.53	1.39e+20	Cluster 1	38.4641
CDC20	UP	62	745.604	1.28e+20	Cluster 1	38.7735
CDCA8	UP	61	145.557	1.32e+20	Cluster 1	38.4641
TTK	UP	61	76.5794	1.4e+20	Cluster 1	38.4641
BUB1B	UP	61	143.481	1.34e+20	Cluster 1	38.4641
ASPM	UP	60	94.4227	1.33e+20	Cluster 1	38.4641
NUSAP1	UP	59	43.6316	1.36e+20	Cluster 1	38.4641
PBK	UP	59	68.885	1.35e+20	Cluster 1	38.4641
DTL	UP	59	289.496	1.29e+20	Cluster 1	38.4641
RRM2	UP	59	537.904	1.32e+20	Cluster 1	38.4641
TPX2	UP	59	220.716	1.32e+20	Cluster 1	38.4641
UBE2C	UP	59	256.06	1.24e+20	Cluster 1	38.7735
DLGAP5	UP	58	43.1791	1.32e+20	Cluster 1	38.4641
AURKA	UP	58	226.077	1.31e+20	Cluster 1	38.4641
NDC80	UP	58	287.122	1.28e+20	Cluster 1	38.4641
CDKN3	UP	57	232.173	1.3e+20	Cluster 1	38.4641
CENPF	UP	57	50.5325	1.25e+20	Cluster 1	38.4641
PRC1	UP	57	48.2359	1.28e+20	Cluster 1	38.4641
KIF20A	UP	56	54.1547	1.26e+20	Cluster 1	38.4641
ZWINT	UP	56	312.614	1.21e+20	Cluster 1	38.8573
CEP55	UP	55	23.7466	1.26e+20	Cluster 1	38.4641
HMMR	UP	55	309.917	1.23e+20	Cluster 1	38.4641
OIP5	UP	54	63.5118	1.2e+20	Cluster 1	38.4641
PTTG1	UP	51	166.815	1.09e+20	Cluster 1	37.6911
KIF15	UP	50	25.7461	1.06e+20	Cluster 1	37.6911
MCM10	UP	50	391.07	9.13e+19	Cluster 1	33.5412
RAD51AP1	UP	49	288.664	9.29e+19	Cluster 1	35.6769
KIF4A	UP	49	140.39	1.03e+20	Cluster 1	38.4641
FANCI	UP	48	135.188	1.03e+20	Cluster 1	37.9026
KIF14	UP	48	17.8856	1.03e+20	Cluster 1	38.8573
RACGAP1	UP	48	224.912	9.75e+19	Cluster 1	37.495
CENPM	UP	47	59.2771	8.73e+19	Cluster 1	34.9474
EXO1	UP	47	358.224	7.77e+19	Cluster 1	31.5429
KIF23	UP	47	16.8034	9.92e+19	Cluster 1	38.7735
NUF2	UP	47	26.6276	9.13e+19	Cluster 1	36.9001
ANLN	UP	46	11.3694	9.6e+19	Cluster 1	37.9026
FOXM1	UP	46	3.59077	1e+20	Cluster 1	37.495
NEK2	UP	45	1.53013	9.78e+19	Cluster 1	38.4641
SPAG5	UP	44	9.30523	9.13e+19	Cluster 1	38.7735
TYMS	UP	42	138.14	7.87e+19	Cluster 1	33.7958
MCM2	UP	40	242.501	5.89e+19		28.5057
FEN1	UP	37	112.124	5.8e+19		28.5606
PCNA	UP	35	9734.51	2.97e+19		16.6957
CKS2	UP	33	75.5616	5.18e+19		29.9395
MKI67	UP	32	0.119091	5.23e+19		31
KNTC1	UP	29	9.12718	3.37e+19		20.58
SMC4	UP	29	133.668	3.38e+19		23
ESPL1	UP	27	6.55417	2.94e+19		22
ATAD2	UP	25	9.84971	2.81e+19		22
POLQ	UP	24	5.7274	2.4e+19		17.7429
SHCBP1	UP	21	0	2.29e+19		21
DEPDC1	UP	19	0	1.9e+19		19
CENPK	UP	19	14.0122	1.11e+19	Cluster 3	14.8897
ERCC6L	UP	19	23.4826	1.19e+19	Cluster 3	14.8897
STIL	UP	18	0.326263	1.57e+19		15.8954
ZWILCH	UP	17	0.858741	1.05e+19	Cluster 3	15
UBE2T	UP	15	33.1949	9.26e+18		11.8681
HIST1H2BD	UP	14	110.78	2.76e+18		7
HIST1H2BH	UP	14	110.78	2.76e+18		7
KPNA2	UP	13	40.6318	6.76e+18		11
RAD54L	UP	11	0.428781	5.15e+18		8.67273
EZH2	UP	11	5.74289	4.62e+18		9
BARD1	UP	11	138.172	1.63e+18	Cluster 4	5
KIF18B	UP	10	0	4.71e+18		10
FGF2	Down	9	10564.7	1.19e+16		1.06667
CCNE2	UP	9	30.4713	1.73e+18		6
SDC1	UP	8	4517	4990000000000		1.2
RMI1	UP	7	18.9617	4.11e+17	Cluster 4	5
ANXA1	Down	6	660.333	1610000000	Cluster 2	4
CXCR4	UP	6	3852.67	4640000000000	Cluster 2	4
ADRB2	Down	6	1531	1610000000		1.06667
LEP	Down	6	1373	9.25651		1.4
PKMYT1	UP	6	1.09921	1.46e+18		5
MMP1	UP	5	858	4810000000000		2
PLIN1	Down	5	856	6.71945		1.2
E2F5	UP	5	0.25	7.48e+17		3.73333
LMNB1	UP	5	0.796296	5.97e+17		4
UBE2S	UP	5	3.2199	5.08e+17		2.4
RMI2	UP	5	0	2.64e+17	Cluster 4	5
CDCA3	UP	4	0	8.66e+17		4
NEIL3	UP	4	0	8.02e+17		4
CDCA2	UP	4	0	9.05e+17		4
HIST1H4H	UP	4	1.4359	1.31e+16		3
HIST1H3E	UP	4	1.4359	1.31e+16		3
BMP2	Down	4	856	4810000000000		2
GPC3	Down	4	235	4810000000000		1.4
CXCL10	UP	4	0	1610000000	Cluster 2	4
CXCL11	UP	4	0	1610000000	Cluster 2	4
EDNRB	Down	4	1114	9.59254		3
COL6A6	Down	3	572	1610000000	Cluster 6	2
VAMP8	UP	3	572	3.89878	Cluster 5	2
ZBTB16	Down	3	0	2.13e+17		3
CAV1	Down	3	903.333	4.56191		2
FN1	UP	3	574	1610000000		0.5
CD36	Down	3	2312	4.70344		2
EDN2	UP	3	0	8.44426		3
IL21R	UP	2	572	2.63001		0.666667
SPP1	UP	2	0	4810000000000		2
TSLP	Down	2	288	2.27371		0.666667
TPD52	UP	2	0	2.77476	Cluster 5	2
LRP8	UP	2	0	6460000000		2
EBF1	Down	2	0	3.80963		2
GPR84	UP	2	0	4.51539		2
COL11A1	UP	2	0	2.80206	Cluster 6	2
BGN	UP	2	0	6460000000		2
CIDEA	Down	2	0	2.98487		2
CIDEC	Down	2	0	2.98487		2
LPL	Down	2	0	3.81054		2
ACVR1C	Down	2	288	1610000000		0.666667
EZR	UP	2	0	3.16113		2
MRAP	Down	1	0	4640000000000		0
IL33	Down	1	0	1.60708		0
PLIN4	Down	1	0	1.80665		0
IRS2	Down	1	0	1.9007		0
